# Supplementary material for: gem-Dibromovinyl phthalonitriles: synthesis, structure elucidation, Hirshfeld surface analysis and energy framework calculations
Source: Royal Society of Chemistry journal article supplement (doi:10.1039/d3nj04853e), 2024-01-01
Supplement: d3nj04853e1.pdf [file d3nj04853e1.pdf]

***gem*-Dibromovinyl phthalonitriles: Synthesis, structure elucidation, Hirshfeld surface analysis and energy framework calculations**

Hasrat Ali and Johan E. van Lier\*

Department of Nuclear Medicine and Radiobiology, Faculty of Medicine and Health Sciences, Université de Sherbrooke, Sherbrooke, Québec, Canada J1H5N4.

Centre d'Imagerie Moléculaire de Sherbrooke (CIMS), CRCHUS,  
3001 12<sup>th</sup> Avenue Nord, Sherbrooke, Québec, Canada J1H5N4

E-mail: Johan.E.vanlier@USherbrooke.ca

Tel. (819) 821-8000 ext. 74603

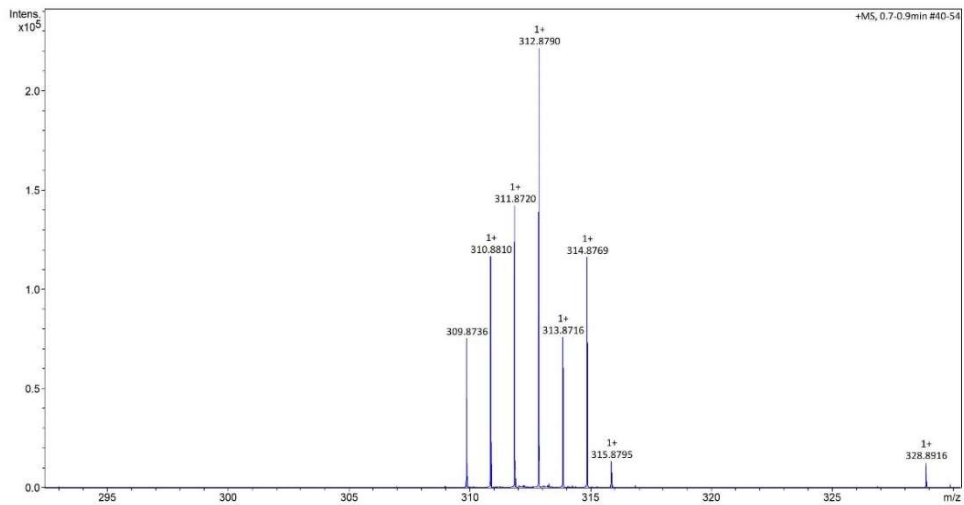

**Fig. S1.** APCI+-MS spectrum of **2**.

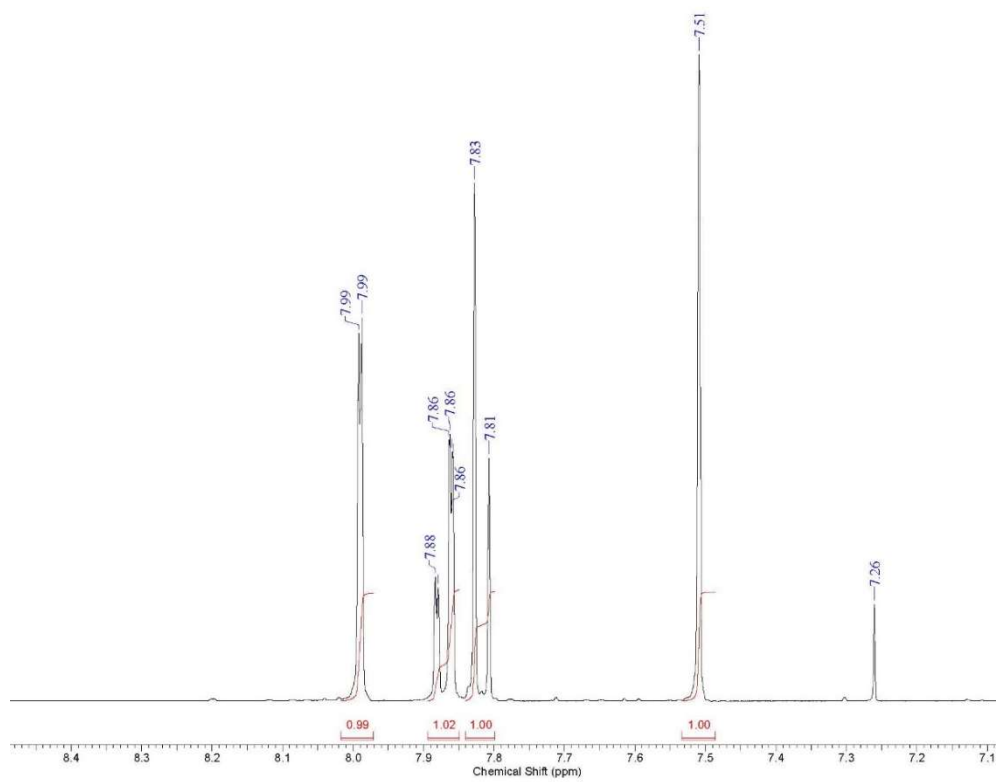

**Fig. S2.**  $^1\text{H}$  NMR of spectrum **2** in  $\text{CDCl}_3$ .

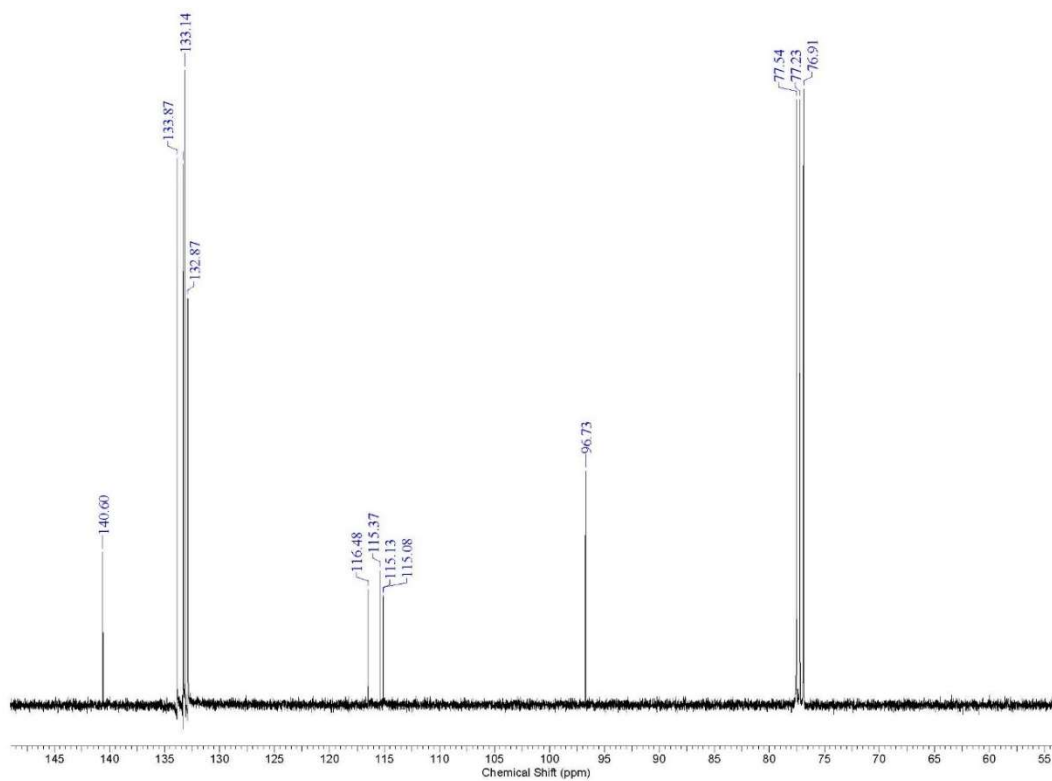

**Fig. S3.**  $^{13}\text{C}$  NMR of spectrum **2** in  $\text{CDCl}_3$ .

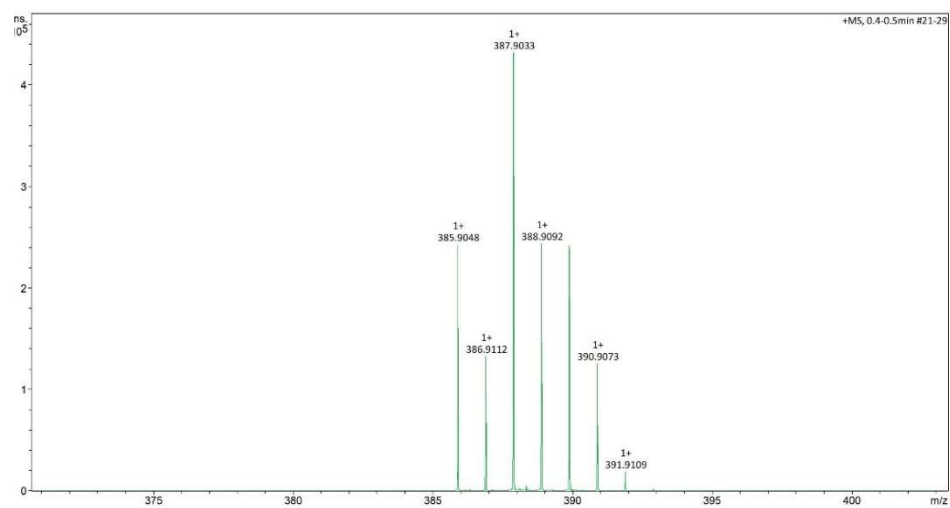

**Fig. S4.** APCI+-MS spectrum of **4**.

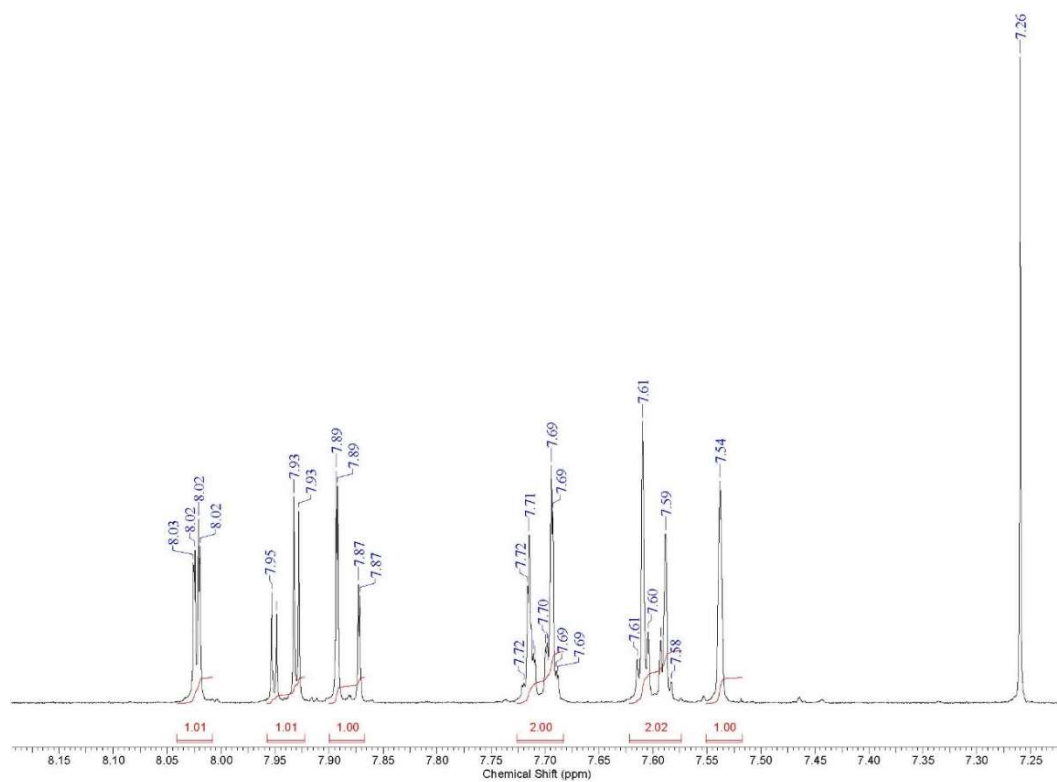

Fig. S5.  $^1\text{H}$  NMR of spectrum 4 in  $\text{CDCl}_3$ .

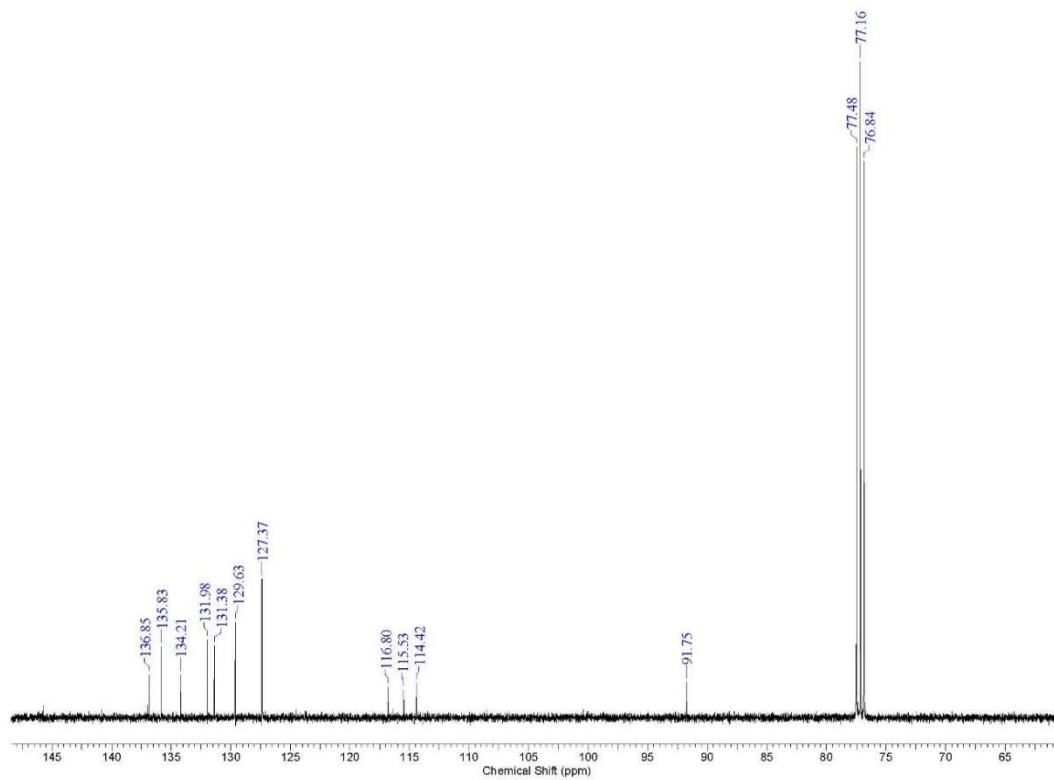

Fig. S6.  $^{13}\text{C}$  NMR of spectrum 4 in  $\text{CDCl}_3$ .

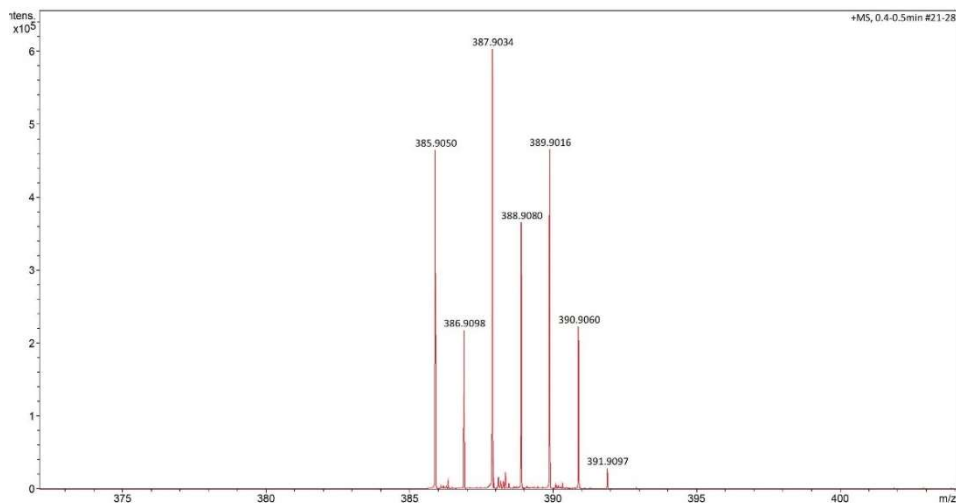

**Fig. S7.** APCI+-MS spectrum of **7**.

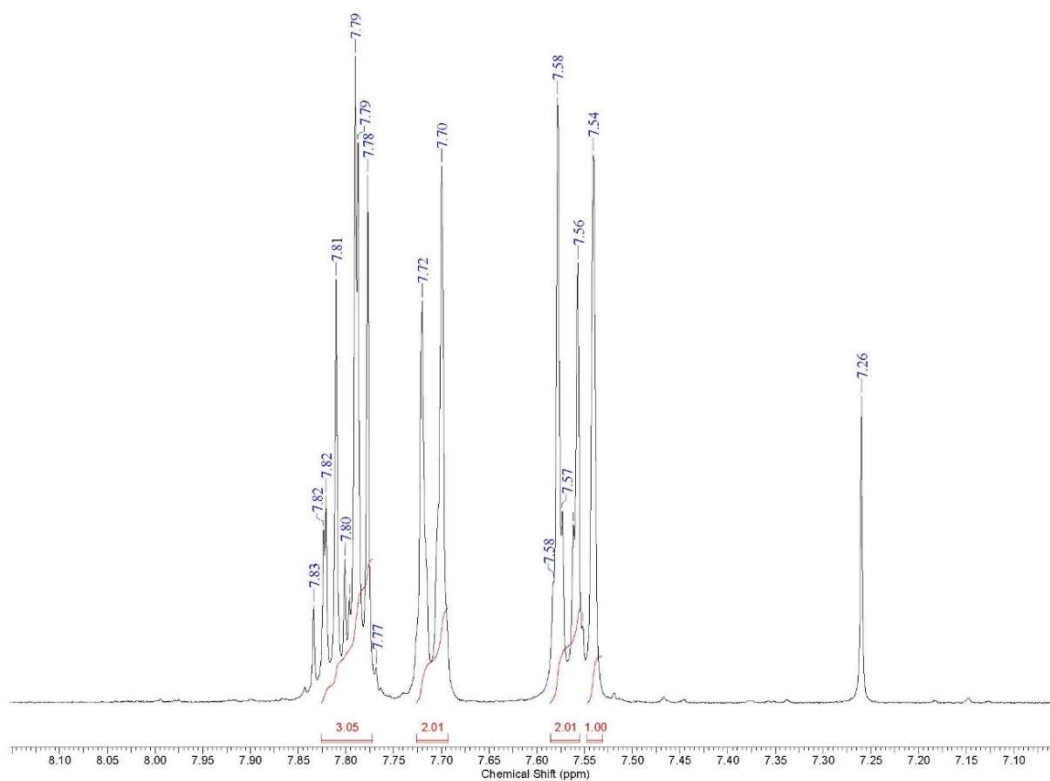

**Fig. S8.**  $^1\text{H}$  NMR of spectrum **7** in  $\text{CDCl}_3$ .

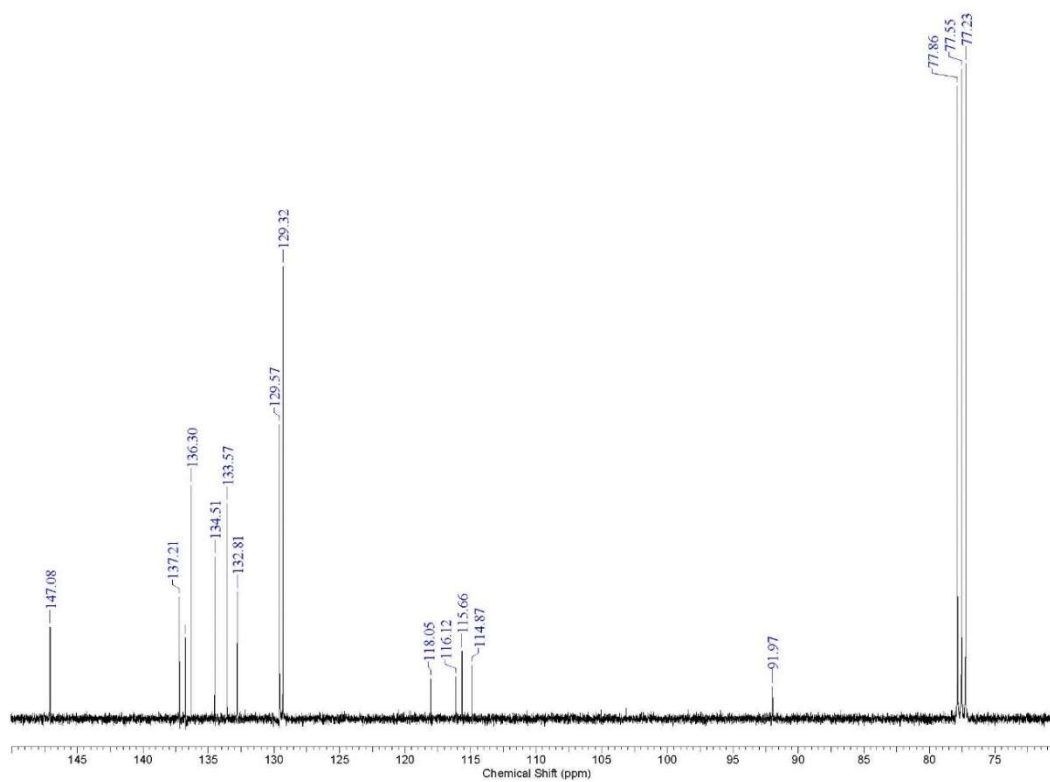

**Fig. S9.**  $^{13}\text{C}$  NMR of spectrum 7 in  $\text{CDCl}_3$ .

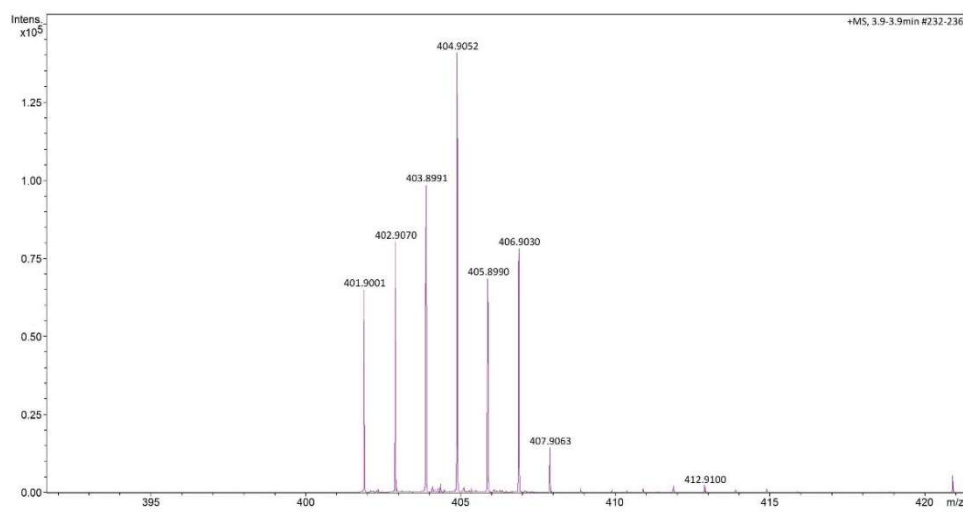

**Fig. S10.** APCI+-MS spectrum of 9.

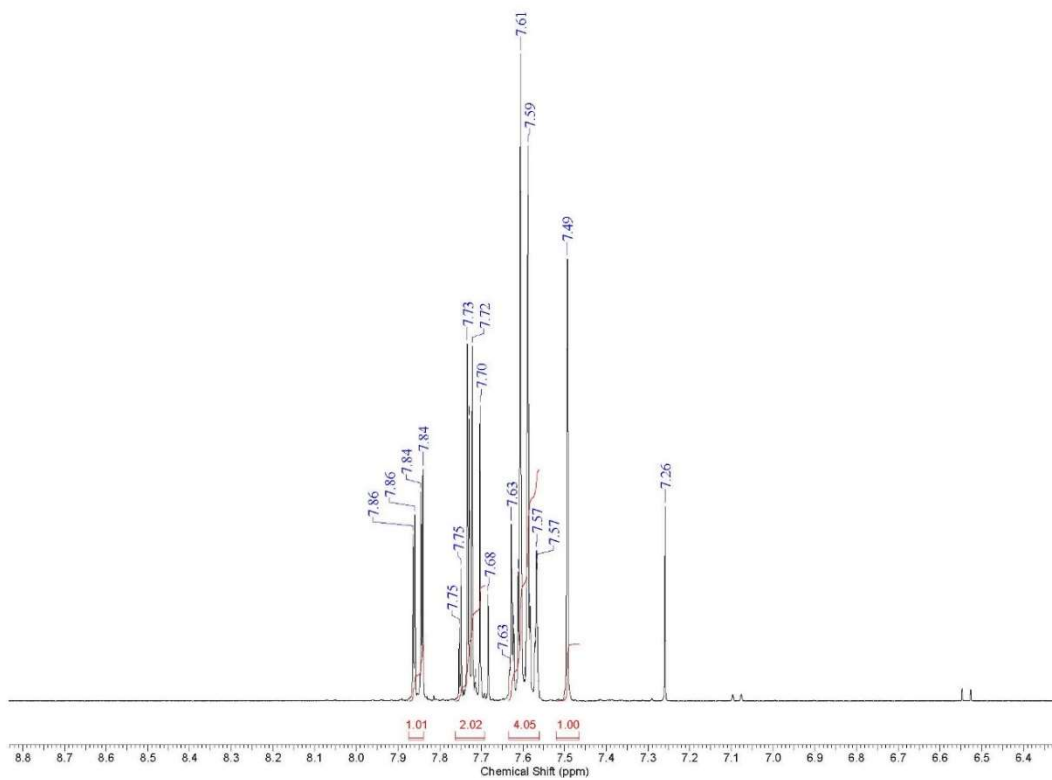

**Fig. S11.**  $^1\text{H}$  NMR of spectrum **9** in  $\text{CDCl}_3$ .

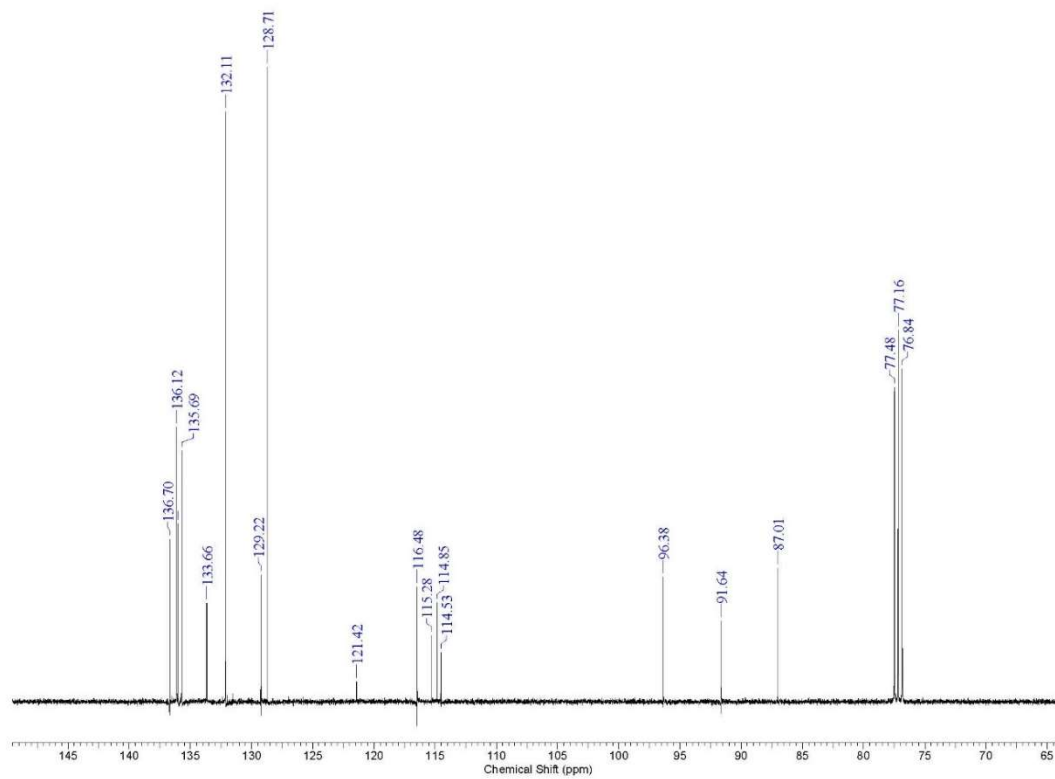

**Fig. S12.**  $^{13}\text{C}$  NMR of spectrum **9** in  $\text{CDCl}_3$ .

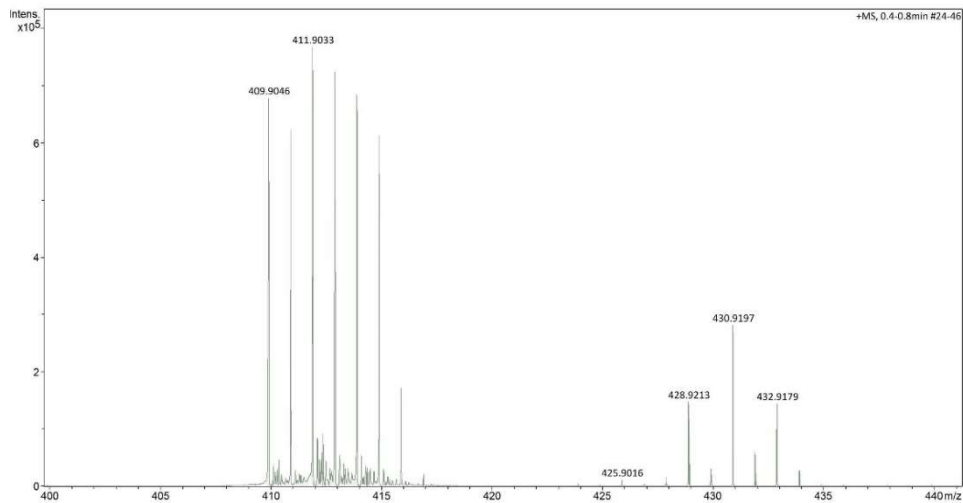

Fig. S13. APCI+-MS spectrum of 11.

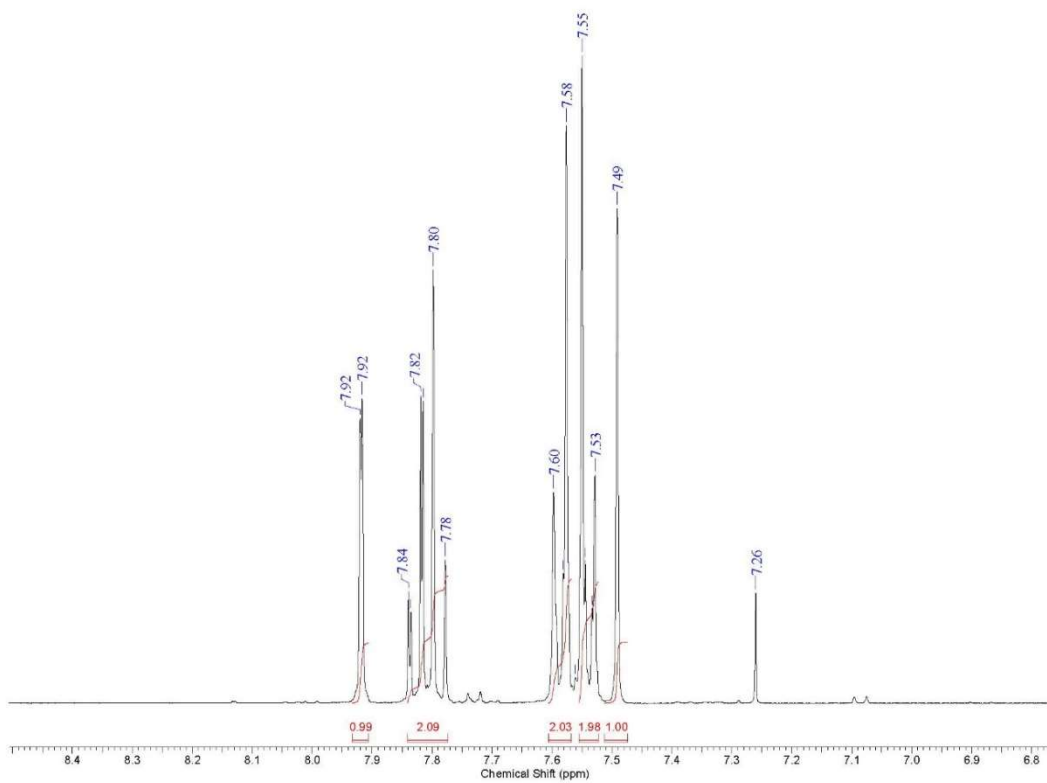

Fig. S14.  $^1\text{H}$  NMR of spectrum 11 in  $\text{CDCl}_3$ .



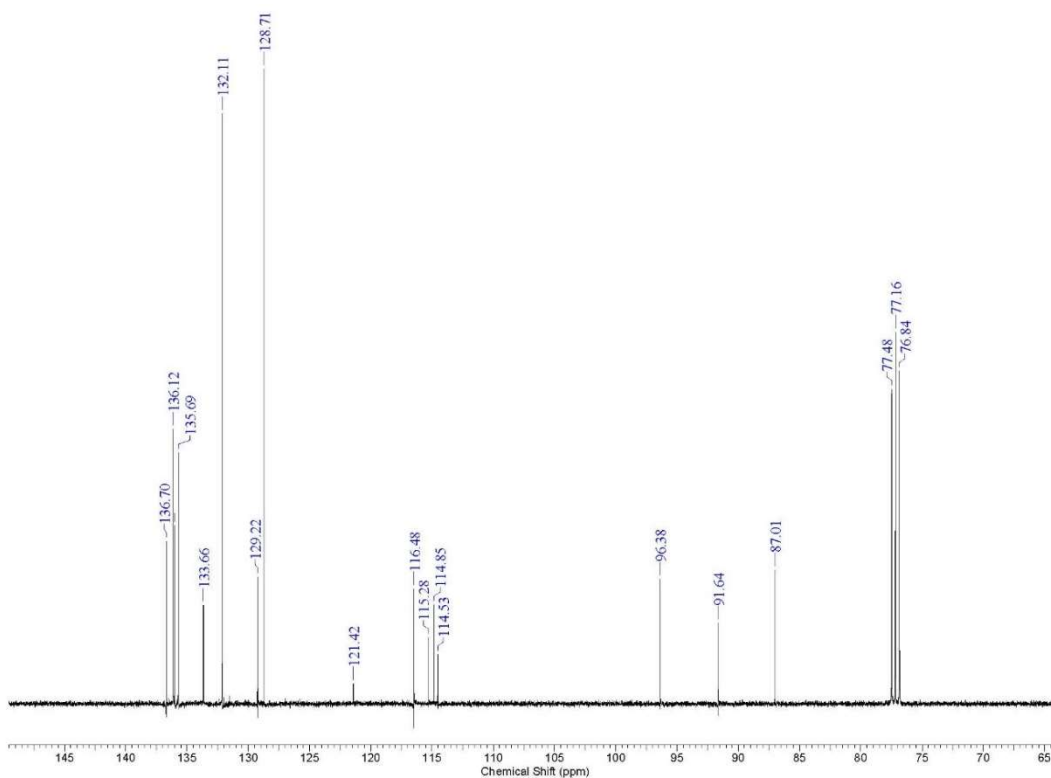

**Fig. S15.**  $^{13}\text{C}$  NMR of spectrum **11** in  $\text{CDCl}_3$ .

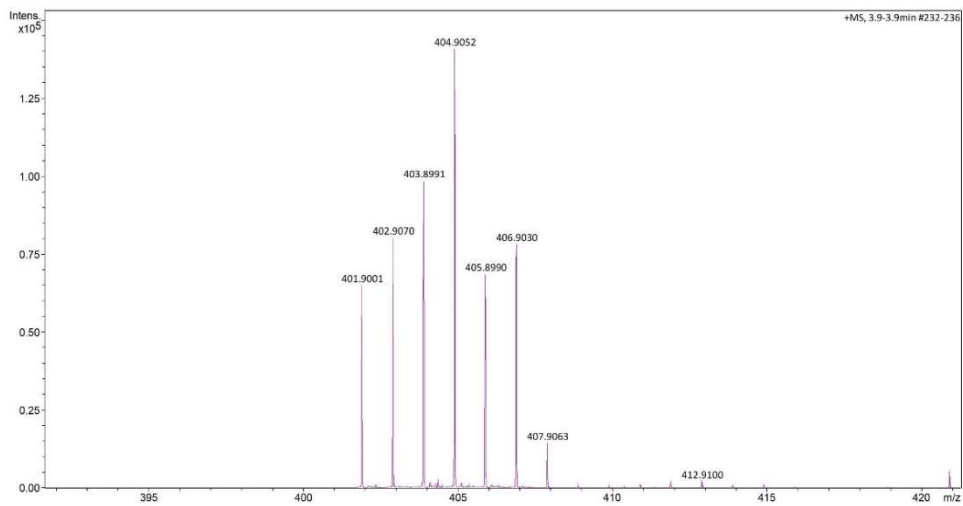

**Fig. S16.** APCI+-MS spectrum of **13**.

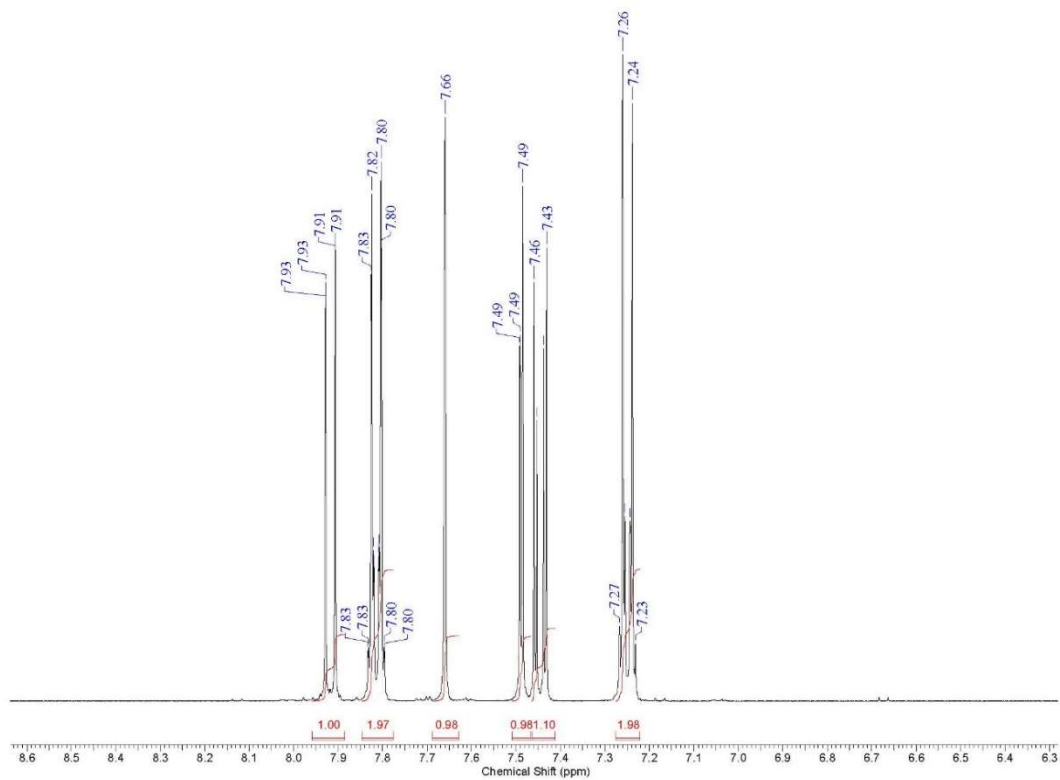

Fig. S17.  $^1\text{H}$  NMR of spectrum **13** in  $\text{CDCl}_3$ .

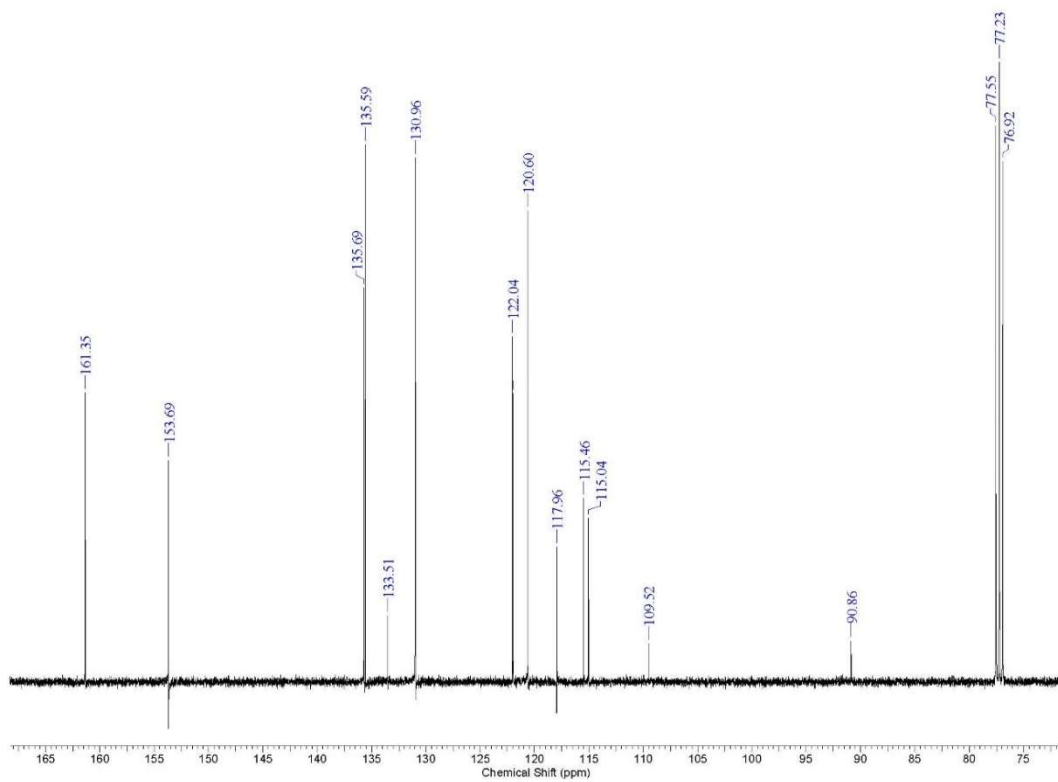

Fig. S18.  $^{13}\text{C}$  NMR of spectrum **13** in  $\text{CDCl}_3$ .

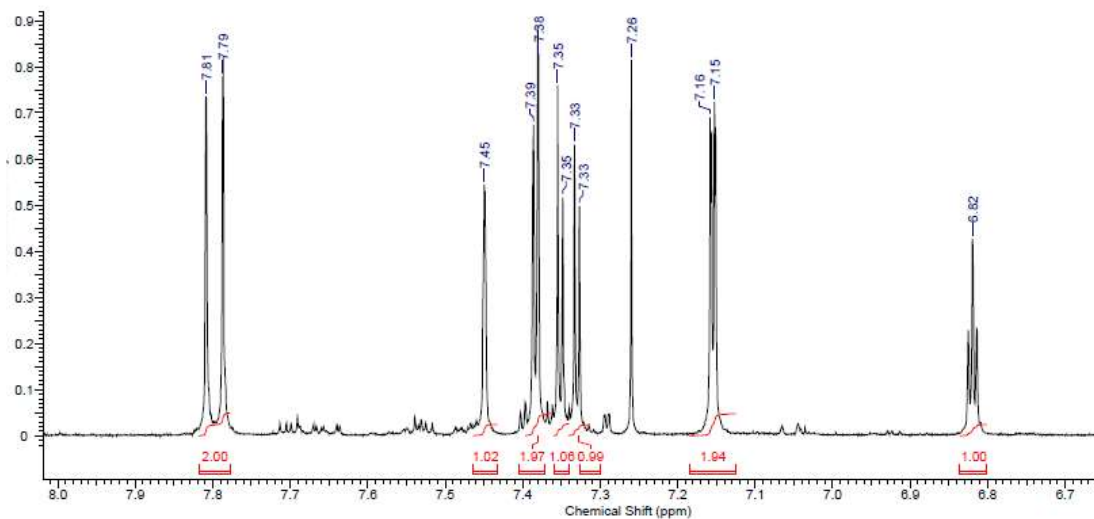

**Fig. S19.**  $^1\text{H}$  NMR of spectrum **16** in  $\text{CDCl}_3$ .

**Table S1:** Comparison of some selected bond lengths [Å] and bond angles [°] obtained from X-ray crystal structures.

| Compound  | $\text{—C}\equiv\text{N1}$ | $\text{—C}\equiv\text{N2}$ | N1C-C                  | N2C-C                  |
|-----------|----------------------------|----------------------------|------------------------|------------------------|
| <b>2A</b> | 1.138(10)                  | 1.137(9)                   | 1.449(10)              | 1.447(9)               |
| <b>2B</b> | 1.139(10)                  | 1.1445(9)                  | 1.456(10)              | 1.439(10)              |
| <b>4</b>  | 1.134(7)                   | 1.136(7)                   | 1.465(7)               | 1.447(8)               |
| <b>7</b>  | 1.136(8)                   | 1.139(9)                   | 1.442(9)               | 1.437(9)               |
| <b>9</b>  | 1.146(7)                   | 1.137(7)                   | 1.439(7)               | 1.443(7)               |
| <b>11</b> | 1.140(4)                   | 1.439(4)                   | 1.443(4)               | 1.439(4)               |
| <b>13</b> | 1.137(5)                   | 1.137(4)                   | 1.438(5)               | 1.445(4)               |
| <b>16</b> | 1.152(14)<br>1.124(12)     | 1.153(13)<br>1.140(11)     | 1.436(15)<br>1.438(14) | 1.441(13)<br>1.477(12) |

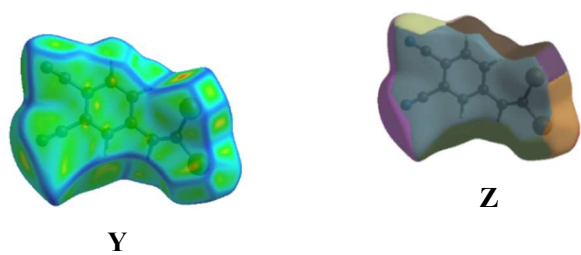

**Fig. S20.** Perspective view of Hirshfeld surfaces of **2A** (Y) curvedness, (Z) Fragment Patch.

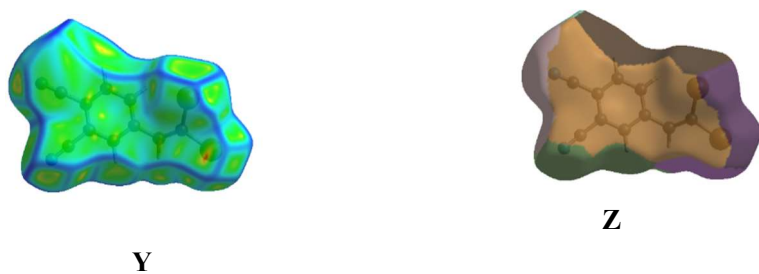

**Fig. S21.** Perspective view of Hirshfeld surfaces of **2B** (Y) curvedness, (Z) Fragment Patch.

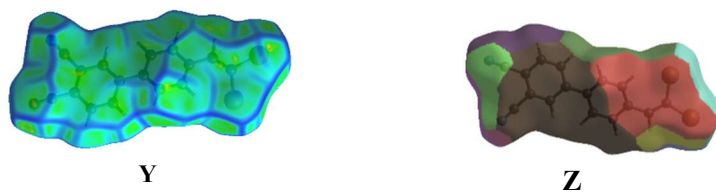

**Fig. S22.** Perspective view of Hirshfeld surfaces of **4** (Y) curvedness, (Z) Fragment Patch.

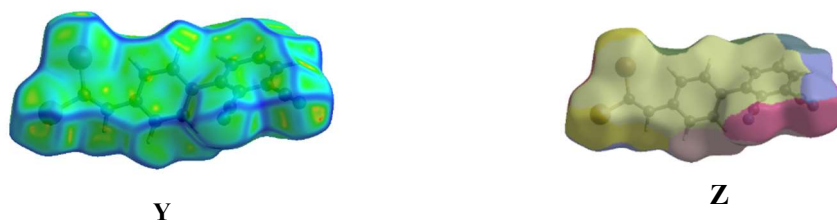

**Fig. S23.** Perspective view of Hirshfeld surfaces of **7** (Y) curvedness, (Z) Fragment Patch.

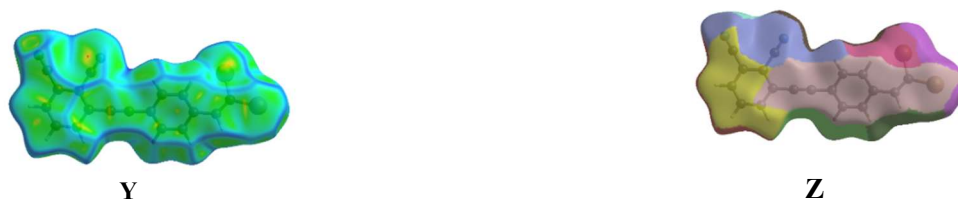

**Fig. S24.** Perspective view of Hirshfeld surfaces of **9** (Y) curvedness, (Z) Fragment Patch.

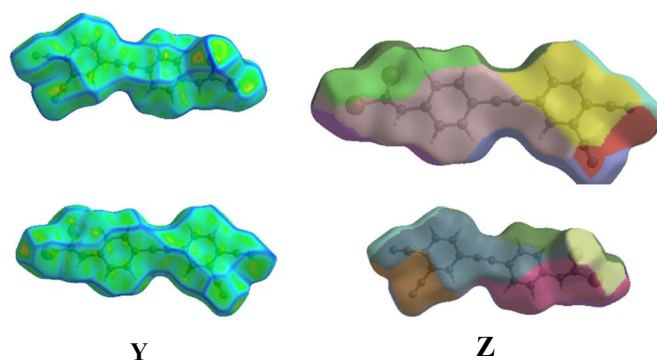

**Fig. S25.** Perspective view of Hirshfeld surfaces of **11** (Y) curvedness, (Z) Fragment Patch.

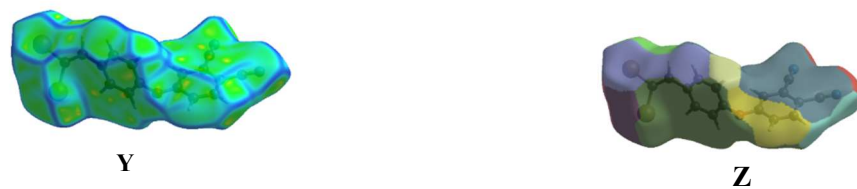

**Fig. S26.** Perspective view of Hirshfeld surfaces of **13** (Y) curvedness, (Z) Fragment Patch.

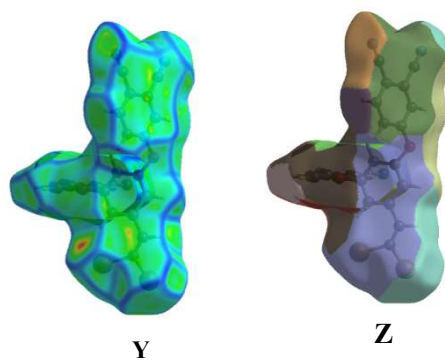

**Fig. S27.** Perspective view of Hirshfeld surfaces of **16** (Y) curvedness, (Z) Fragment Patch.

Total energies, only reported for two benchmarked energy models, are the sum of the four energy components, scaled appropriately ( scale factor table below)

Interaction energies. N refers to the number of molecules, R is the distance between molecular centroids (mean atomic position) in Å. Energies in kJ mol<sup>-1</sup>.

Scale factors for benchmarked energy models

See Mackenzie et al. IUCrJ (2017)

| Energy Model                                     | k_ele | k_pol | k_disp | k_rep |
|--------------------------------------------------|-------|-------|--------|-------|
| CE-HF ... HF/3-21G electron densities            | 1.019 | 0.651 | 0.901  | 0.811 |
| CE-B3LYP ... B3LYP/6-31G(d,p) electron densities | 1.057 | 0.740 | 0.871  | 0.618 |

**Fig. S28.** Interaction energies of **2A**.

|  | N | Symop      | R     | Electron Density | E_ele | E_pol | E_dis | E_rep | E_tot |
|--|---|------------|-------|------------------|-------|-------|-------|-------|-------|
|  | 1 | -x, -y, -z | 13.40 | B3LYP/6-31G(d,p) | -5.5  | -1.2  | -3.4  | 0.0   | -9.7  |
|  | 2 | x, y, z    | 3.89  | B3LYP/6-31G(d,p) | 0.2   | -3.2  | -59.2 | 44.2  | -26.4 |
|  | 1 | -          | 10.04 | B3LYP/6-31G(d,p) | -19.9 | -0.1  | -9.4  | 21.3  | -16.1 |
|  | 1 | -x, -y, -z | 12.12 | B3LYP/6-31G(d,p) | -18.0 | 0.0   | -11.7 | 0.0   | -29.3 |
|  | 1 | -          | 7.70  | B3LYP/6-31G(d,p) | -4.4  | -5.5  | -15.3 | 16.5  | -11.9 |
|  | 1 | -          | 7.96  | B3LYP/6-31G(d,p) | -0.0  | -1.0  | -9.8  | 6.5   | -5.3  |
|  | 1 | -          | 9.33  | B3LYP/6-31G(d,p) | -9.5  | -5.1  | -12.3 | 10.1  | -18.4 |
|  | 1 | -          | 9.48  | B3LYP/6-31G(d,p) | -10.9 | -3.2  | -13.3 | 12.6  | -17.6 |
|  | 1 | -x, -y, -z | 8.51  | B3LYP/6-31G(d,p) | -3.3  | -0.2  | -6.4  | 8.9   | -3.6  |
|  | 1 | -          | 7.43  | B3LYP/6-31G(d,p) | -2.9  | -0.8  | -12.7 | 10.9  | -8.1  |
|  | 1 | -          | 9.02  | B3LYP/6-31G(d,p) | 2.0   | -0.2  | -5.8  | 2.8   | -1.4  |
|  | 1 | -          | 10.41 | B3LYP/6-31G(d,p) | -17.2 | -2.3  | -9.7  | 16.3  | -18.2 |

**Fig. S29.** Interaction energies of **2B**.

|  | N | Symop      | R     | Electron Density | E_ele | E_pol | E_dis | E_rep | E_tot |
|--|---|------------|-------|------------------|-------|-------|-------|-------|-------|
|  | 2 | x, y, z    | 3.89  | B3LYP/6-31G(d,p) | 0.2   | -3.8  | -58.9 | 44.0  | -26.7 |
|  | 1 | -          | 7.70  | B3LYP/6-31G(d,p) | -19.9 | -3.8  | -9.4  | 21.3  | -18.9 |
|  | 1 | -          | 9.48  | B3LYP/6-31G(d,p) | 1.0   | -0.0  | -0.0  | 0.0   | 1.1   |
|  | 1 | -          | 9.33  | B3LYP/6-31G(d,p) | 0.0   | -4.2  | 0.0   | 0.0   | -3.1  |
|  | 1 | -          | 9.02  | B3LYP/6-31G(d,p) | -0.5  | -1.0  | -0.0  | 0.0   | -1.2  |
|  | 1 | -x, -y, -z | 8.77  | B3LYP/6-31G(d,p) | -23.2 | -0.3  | -18.0 | 17.4  | -29.7 |
|  | 1 | -          | 7.43  | B3LYP/6-31G(d,p) | -1.7  | -0.3  | -0.8  | 0.0   | -2.6  |
|  | 1 | -          | 10.41 | B3LYP/6-31G(d,p) | 0.8   | -0.0  | -0.0  | 0.0   | 0.9   |
|  | 1 | -          | 10.04 | B3LYP/6-31G(d,p) | -4.4  | -2.6  | -15.3 | 16.5  | -9.7  |
|  | 1 | -          | 7.96  | B3LYP/6-31G(d,p) | -0.6  | -0.0  | -0.0  | 0.0   | -0.6  |
|  | 1 | -x, -y, -z | 9.63  | B3LYP/6-31G(d,p) | -26.8 | -3.2  | -13.1 | 21.3  | -29.0 |

**Fig. S30.** Interaction energies of **4**.

|  | N | Symop   | R     | Electron Density | E_ele | E_pol | E_dis | E_rep | E_tot |
|--|---|---------|-------|------------------|-------|-------|-------|-------|-------|
|  | 1 | -       | 9.43  | B3LYP/6-31G(d,p) | -8.8  | -2.8  | -16.8 | 18.5  | -14.6 |
|  | 2 | x, y, z | 13.37 | B3LYP/6-31G(d,p) | -0.4  | -1.0  | -4.6  | 0.0   | -5.2  |
|  | 1 | -       | 4.97  | B3LYP/6-31G(d,p) | -7.6  | -2.8  | -61.0 | 35.3  | -41.4 |
|  | 1 | -       | 12.23 | B3LYP/6-31G(d,p) | -29.9 | -4.7  | -12.3 | 0.0   | -45.8 |
|  | 1 | -       | 15.15 | B3LYP/6-31G(d,p) | 6.0   | -2.2  | -8.4  | 0.0   | -2.6  |
|  | 1 | -       | 10.40 | B3LYP/6-31G(d,p) | -2.3  | -2.1  | -11.6 | 9.4   | -8.3  |
|  | 2 | x, y, z | 9.14  | B3LYP/6-31G(d,p) | -10.4 | -2.1  | -43.3 | 28.5  | -32.6 |
|  | 2 | x, y, z | 12.01 | B3LYP/6-31G(d,p) | -8.0  | -2.2  | -11.7 | 0.0   | -20.2 |
|  | 1 | -       | 4.97  | B3LYP/6-31G(d,p) | -7.7  | -2.5  | -61.1 | 35.7  | -41.0 |
|  | 1 | -       | 15.15 | B3LYP/6-31G(d,p) | 2.1   | -2.2  | -8.4  | 0.0   | -6.6  |
|  | 1 | -       | 12.23 | B3LYP/6-31G(d,p) | -16.7 | -4.7  | -12.3 | 0.0   | -31.9 |
|  | 1 | -       | 10.40 | B3LYP/6-31G(d,p) | -2.3  | -0.3  | -11.5 | 9.3   | -7.0  |
|  | 1 | -       | 9.43  | B3LYP/6-31G(d,p) | -8.8  | -0.3  | -16.8 | 18.6  | -12.6 |

**Fig. S31.** Interaction energies of **7**.

|  | N | Symop      | R     | Electron Density | E_ele | E_pol | E_dis | E_rep | E_tot |
|--|---|------------|-------|------------------|-------|-------|-------|-------|-------|
|  | 2 | x, y, z    | 8.15  | B3LYP/6-31G(d,p) | -16.6 | -4.5  | -13.1 | 11.1  | -25.4 |
|  | 1 | -x, -y, -z | 16.55 | B3LYP/6-31G(d,p) | -8.6  | -2.8  | -9.1  | 0.0   | -19.1 |
|  | 2 | x, y, z    | 3.94  | B3LYP/6-31G(d,p) | -4.1  | -3.8  | -91.5 | 62.6  | -48.2 |
|  | 1 | -x, -y, -z | 9.37  | B3LYP/6-31G(d,p) | -4.6  | -0.4  | -14.3 | 11.1  | -10.7 |
|  | 2 | x, y, z    | 9.17  | B3LYP/6-31G(d,p) | 2.7   | -0.5  | -5.6  | 0.6   | -2.0  |
|  | 2 | x, y, z    | 7.73  | B3LYP/6-31G(d,p) | -9.2  | -4.1  | -23.9 | 18.3  | -22.3 |
|  | 1 | -x, -y, -z | 17.24 | B3LYP/6-31G(d,p) | -18.7 | -3.4  | -9.9  | 0.0   | -31.0 |
|  | 1 | -x, -y, -z | 8.93  | B3LYP/6-31G(d,p) | -5.2  | -0.9  | -16.4 | 16.4  | -10.2 |
|  | 1 | -x, -y, -z | 14.40 | B3LYP/6-31G(d,p) | 4.2   | -1.8  | -11.4 | 0.0   | -6.8  |
|  | 1 | -x, -y, -z | 15.90 | B3LYP/6-31G(d,p) | 5.2   | -1.0  | -3.4  | 0.0   | 1.8   |

**Fig. S32.** Interaction energies of **9**.

|  | N | Symop             | R     | Electron Density | E_ele | E_pol | E_dis | E_rep | E_tot |
|--|---|-------------------|-------|------------------|-------|-------|-------|-------|-------|
|  | 2 | x, y, z           | 13.76 | B3LYP/6-31G(d,p) | -7.0  | -3.1  | -8.5  | 0.0   | -17.2 |
|  | 1 | -x, -y, -z        | 6.59  | B3LYP/6-31G(d,p) | -19.0 | -4.7  | -60.2 | 37.3  | -52.9 |
|  | 2 | x, -y+1/2, z+1/2  | 10.60 | B3LYP/6-31G(d,p) | -3.4  | -2.1  | -25.7 | 13.4  | -19.3 |
|  | 1 | -x, -y, -z        | 11.80 | B3LYP/6-31G(d,p) | -22.1 | -6.8  | -25.9 | 25.4  | -35.3 |
|  | 2 | -x, y+1/2, -z+1/2 | 11.54 | B3LYP/6-31G(d,p) | -17.6 | -5.6  | -22.1 | 21.7  | -28.5 |
|  | 2 | x, -y+1/2, z+1/2  | 7.88  | B3LYP/6-31G(d,p) | -3.6  | -0.5  | -17.9 | 17.0  | -9.3  |
|  | 1 | -x, -y, -z        | 4.75  | B3LYP/6-31G(d,p) | -9.9  | -0.8  | -59.7 | 35.5  | -41.1 |
|  | 2 | -x, y+1/2, -z+1/2 | 9.73  | B3LYP/6-31G(d,p) | -4.4  | -0.6  | -20.7 | 21.2  | -10.1 |
|  | 1 | -x, -y, -z        | 9.10  | B3LYP/6-31G(d,p) | -3.8  | -1.4  | -19.3 | 11.4  | -14.8 |



**Fig. S33.** Interaction energies of **11**.

|  | N | Symop      | R     | Electron Density | E_ele | E_pol | E_dis | E_rep | E_tot |
|--|---|------------|-------|------------------|-------|-------|-------|-------|-------|
|  | 1 | -x, -y, -z | 17.39 | B3LYP/6-31G(d,p) | -18.3 | -4.1  | -19.4 | 0.0   | -39.2 |
|  | 2 | x, y, z    | 16.11 | B3LYP/6-31G(d,p) | -10.6 | -1.2  | -10.9 | 0.0   | -21.7 |
|  | 2 | x, y, z    | 6.79  | B3LYP/6-31G(d,p) | -8.4  | -2.7  | -59.2 | 42.1  | -36.5 |
|  | 1 | -x, -y, -z | 14.41 | B3LYP/6-31G(d,p) | 10.4  | -3.1  | -37.7 | 0.0   | -24.1 |
|  | 1 | -x, -y, -z | 5.68  | B3LYP/6-31G(d,p) | -13.0 | -1.6  | -37.5 | 35.5  | -25.7 |
|  | 1 | -x, -y, -z | 13.11 | B3LYP/6-31G(d,p) | -31.4 | -6.9  | -19.9 | 0.0   | -55.6 |
|  | 1 | -x, -y, -z | 5.96  | B3LYP/6-31G(d,p) | -9.5  | -1.5  | -44.7 | 28.3  | -32.6 |
|  | 1 | -x, -y, -z | 8.39  | B3LYP/6-31G(d,p) | -4.3  | -0.8  | -27.7 | 16.8  | -19.0 |

**Fig. S34.** Interaction energies of **13**.

|  | N | Symop             | R     | Electron Density | E_ele | E_pol | E_dis | E_rep | E_tot |
|--|---|-------------------|-------|------------------|-------|-------|-------|-------|-------|
|  | 1 | -x, -y, -z        | 17.79 | B3LYP/6-31G(d,p) | -24.2 | -3.7  | -9.7  | 0.0   | -36.8 |
|  | 2 | x, y, z           | 10.56 | B3LYP/6-31G(d,p) | 0.6   | -0.9  | -18.5 | 12.9  | -8.2  |
|  | 2 | x, -y+1/2, z+1/2  | 13.78 | B3LYP/6-31G(d,p) | -14.2 | -3.0  | -11.2 | 0.0   | -27.0 |
|  | 2 | -x, y+1/2, -z+1/2 | 7.67  | B3LYP/6-31G(d,p) | -6.3  | -3.6  | -55.4 | 32.7  | -37.3 |
|  | 2 | x, -y+1/2, z+1/2  | 9.87  | B3LYP/6-31G(d,p) | -9.4  | -2.0  | -4.5  | 3.5   | -13.3 |
|  | 1 | -x, -y, -z        | 14.31 | B3LYP/6-31G(d,p) | 1.5   | -1.0  | -1.9  | 0.0   | -0.8  |
|  | 1 | -x, -y, -z        | 9.65  | B3LYP/6-31G(d,p) | -23.7 | -7.0  | -42.4 | 29.9  | -48.7 |
|  | 2 | -x, y+1/2, -z+1/2 | 6.26  | B3LYP/6-31G(d,p) | -13.0 | -2.0  | -34.1 | 39.4  | -20.6 |
|  | 2 | x, -y+1/2, z+1/2  | 12.61 | B3LYP/6-31G(d,p) | 4.1   | -0.7  | -12.2 | 0.0   | -6.8  |
|  | 1 | -x, -y, -z        | 8.31  | B3LYP/6-31G(d,p) | -8.2  | -1.3  | -20.3 | 23.4  | -12.8 |

**Fig. S35.** Interaction energies of **16**.

|  | N | Symop             | R     | Electron Density | E_ele | E_pol | E_dis | E_rep | E_tot |
|--|---|-------------------|-------|------------------|-------|-------|-------|-------|-------|
|  | 2 | -x+1/2, -y, z+1/2 | 14.93 | B3LYP/6-31G(d,p) | -13.0 | -2.8  | -6.6  | 0.0   | -21.6 |
|  | 2 | x+1/2, -y+1/2, -z | 15.63 | B3LYP/6-31G(d,p) | -15.2 | -3.1  | -9.0  | 0.0   | -26.1 |
|  | 2 | x, y, z           | 6.13  | B3LYP/6-31G(d,p) | 7.2   | -7.0  | -54.0 | 33.6  | -23.8 |
|  | 2 | -x+1/2, -y, z+1/2 | 11.89 | B3LYP/6-31G(d,p) | -12.3 | -4.4  | -38.5 | 23.9  | -35.0 |
|  | 2 | -x, y+1/2, -z+1/2 | 10.23 | B3LYP/6-31G(d,p) | -8.7  | -2.8  | -8.2  | 7.1   | -13.9 |
|  | 2 | x+1/2, -y+1/2, -z | 14.79 | B3LYP/6-31G(d,p) | -19.3 | -3.5  | -11.9 | 0.0   | -33.4 |
|  | 2 | -x, y+1/2, -z+1/2 | 7.78  | B3LYP/6-31G(d,p) | -26.0 | -6.6  | -64.6 | 60.3  | -51.4 |
|  | 2 | -x, y+1/2, -z+1/2 | 9.57  | B3LYP/6-31G(d,p) | -18.8 | -4.4  | -27.4 | 29.6  | -28.7 |
|  | 2 | -x+1/2, -y, z+1/2 | 11.61 | B3LYP/6-31G(d,p) | -3.7  | -1.6  | -9.8  | 5.6   | -10.2 |
